# Supplementary material for: Seeing red; the development of pON.mCherry, a broad-host range constitutive expression plasmid for Gram-negative bacteria
Source: PubMed Central journal article supplement (PMC5336243; doi:10.1371/journal.pone.0173116), 2017-03-03
Supplement: pone.0173116.s001.pdf [file pone.0173116.s001.pdf]

Table S1. Oligonucleotide Primers used in this study

| Primer | Sequence (5'-3')                                              |
|--------|---------------------------------------------------------------|
| MJG036 | CAGACCGCTTCTGCGTTCTGAT                                        |
| MJG394 | TAGGCCGCTTTCCTGGCTTTG                                         |
| MJG406 | CCAAGCGGCCGGAGAACCTG                                          |
| MJG407 | GCCTTGCAGCACATCCCCCT                                          |
| MJG879 | GAATTCTGTTTCCTGTGTGAAANNNNNNNNNNNNNNNNNNNTTCCACACATTATACGAGCC |
| MJG880 | TTTCACACAGGAAACAGAATTCTTTAAGAAGG                              |
